# Supplementary material
Source: HighWire-hosted journal article supplement (https://bmjopenquality.bmj.com/highwire/filestream/136137/field_highwire_adjunct_files/1/ds6240.xlsx)
Supplement: ds6240.xlsx [file ds6240.xlsx]

## Sheet: PHASE I
Initial BM	Symptoms documented	Treatment documented	BM repeated post treatment? (<60 minutes)	Cause of hypo documented	Documentation of action taken to prevent further hypoglycaemic episodes?
2.8	No	No	Yes	No	No
3.7	No	No	No	No	No
2.4	No	Yes	Yes	No	No
3.1	No	Yes	Yes	No	Yes
3.6	No	No	No	No	Yes
2.4	No	Yes	Yes	No	Yes
3.8	No	No	Yes	No	No
2.2	No	Yes	Yes	No	Yes
3.4	No	No	No	No	No
3.4	No	No	No	No	No
3.7	No	No	Yes	No	No
3.3	No	No	No	No	No
2.4	No	No	No	No	No
2.7	No	No	No	Yes - to med	Yes
3.8	No	No	Yes	Yes - to med	Yes
3.8	No	No	No	No	No
3.8	No	No	No	No	No

## Sheet: PHASE II
Initial BM	Symptoms documented	Treatment documented	BM repeated post treatment? (<60 minutes)	Cause of hypo documented	Documentation of action taken to prevent further hypoglycaemic episodes?
2.7	No	Yes	Yes	No	Yes
3.4	No	No	Yes	No	Yes
2.1	Yes	Yes	Yes	No	Yes
3.4	No	No	Yes	No	No
3.6	Yes	No	Yes	No	Yes
3.7	No	Yes	Yes	No	Yes
2.2	No	Yes	Yes	No	Yes
2.9	No	Yes	Yes	No	Yes
3.4	Yes	No	Yes	No	Yes
3.8	No	No	Yes	No	Yes
2.9	Yes	Yes	Yes	No	Yes
3.4	No	Yes	Yes	No	Yes
3.6	No	Yes	Yes	No	No
3.1	No	Yes	Yes	No	Yes
2.9	No	Yes	Yes	No	Yes
3.3	No	Yes	Yes	No	Yes

## Sheet: PHASE III
Initial BM	Symptoms documented	Treatment documented	BM repeated post treatment? (<60 minutes)	Cause of hypo documented	Documentation of action taken to prevent further hypoglycaemic episodes?
2.8	No	Yes	Yes	No	Yes
3.6	No	No	Yes	No	No
3.5	No	Yes	Yes	No	Yes
2.6	No	Yes	Yes	No	Yes
2.9	No	Yes	Yes	No	Yes
3.1	No	Yes	Yes	No	Yes
2.8	No	Yes	Yes	No	Yes
2.5	Yes	Yes	Yes	No	Yes
3.7	No	No	Yes	No	Yes
3.1	No	Yes	Yes	No	Yes
3.5	No	Yes	Yes	No	Yes
3.4	No	Yes	Yes	No	Yes
2.8	No	Yes	Yes	No	Yes
3.8	No	No	Yes	No	Yes
3.6	No	No	Yes	No	Yes
2.4	Yes	Yes	Yes	No	Yes
